# Supplementary material for: Litchi chinensis seed prevents obesity and modulates the gut microbiota and mycobiota compositions in high-fat diet-induced obese zebrafish
Source: Royal Society of Chemistry journal article supplement (doi:10.1039/d1fo03991a), 2022-01-01
Supplement: d1fo03991a2.pdf [file d1fo03991a2.pdf]

***Litchi chinensis* seed prevents obesity and modulates the gut microbiota and mycobiota compositions in high-fat diet-induced obese zebrafish**

Jun-Yan Xiang<sup>1,3</sup>, Yan-Yu Chi<sup>1,3</sup>, Jin-Xin Han<sup>1,3</sup>, Ping Kong<sup>1,3</sup>, Zehua Liang<sup>1,3</sup>, Deli Wang<sup>3\*</sup>,  
Hongyu Xiang<sup>1,2,3,4\*</sup>, Qihong Xie<sup>1,2,3,4\*</sup>

<sup>1</sup> Key Laboratory for Molecular Enzymology and Engineering of Ministry of Education, School of Life Sciences, Jilin University, Changchun 130012, People's Republic of China

<sup>2</sup> National Engineering Laboratory for AIDS Vaccine, School of Life Sciences, Jilin University, Changchun 130012, People's Republic of China

<sup>3</sup> School of Life Sciences, Jilin University, Changchun 130012, People's Republic of China

<sup>4</sup> Institute of Changbai Mountain Resource and Health, Jilin University, Fusong 134504, People's Republic of China

\* Corresponding authors:

Deli Wang, E-mail: wangdl@jlu.edu.cn

Hongyu Xiang, Professor; E-mail: hyxiang@jlu.edu.cn

Qihong Xie, Professor; E-mail: qhxie@jlu.edu.cn

Tel & Fax: +86-431-85153832

ORCID ID: 0000-0002-3902-8436

## Figures

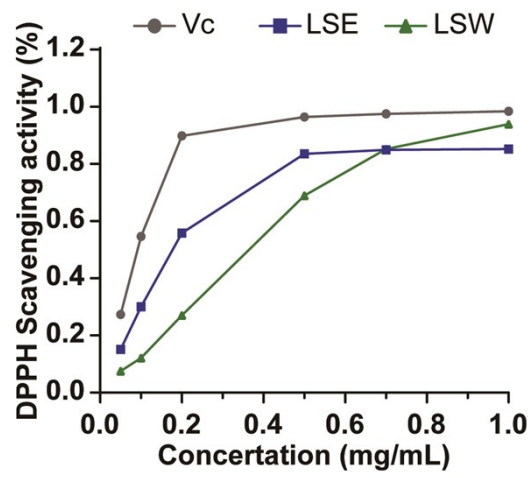

Fig. S1 Antioxidant activities of *L. chinensis* seed extracts

Scavenging effect on DPPH.

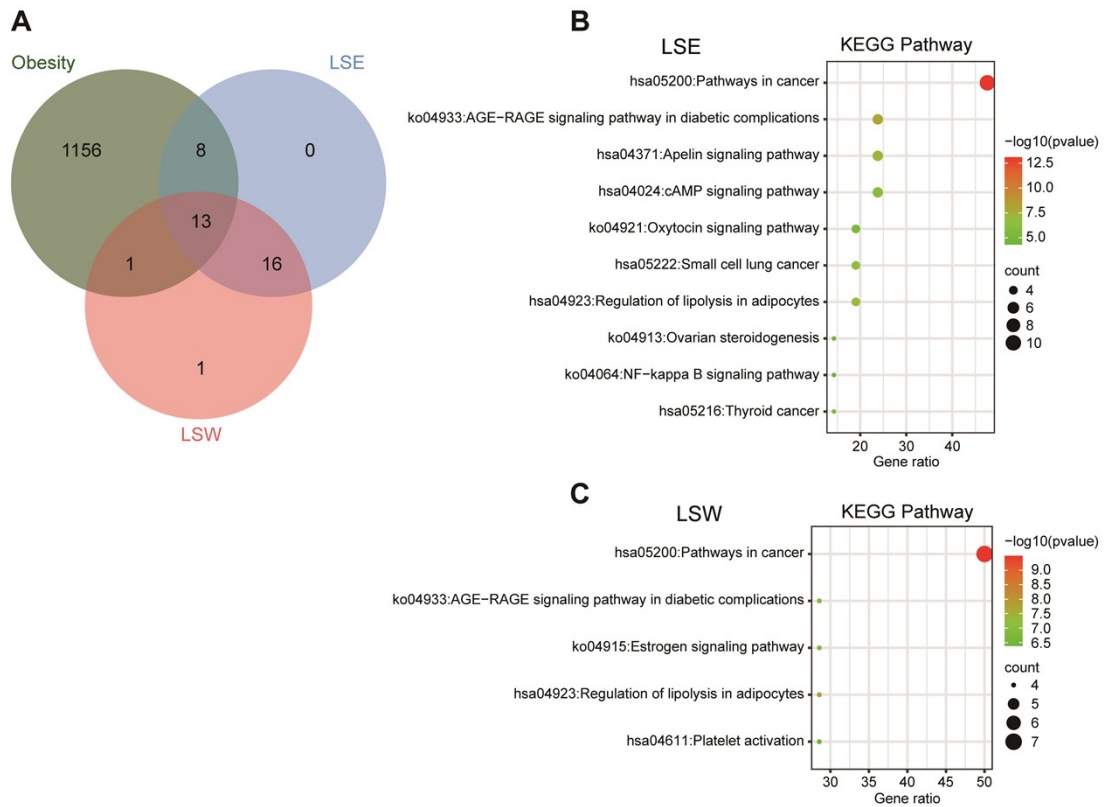

Fig. S2 Network pharmacology analysis of *L. chinensis* seed extracts in the treatment of obesity

(A) Venn diagram for *L. chinensis* seed extracts and obesity targets. (B–C) KEGG pathway

enrichment of *L. chinensis* seed ethanol and water extract in obesity treatment. LSE, *L. chinensis*

seed ethanol extract; LSW, *L. chinensis* seed water extract.

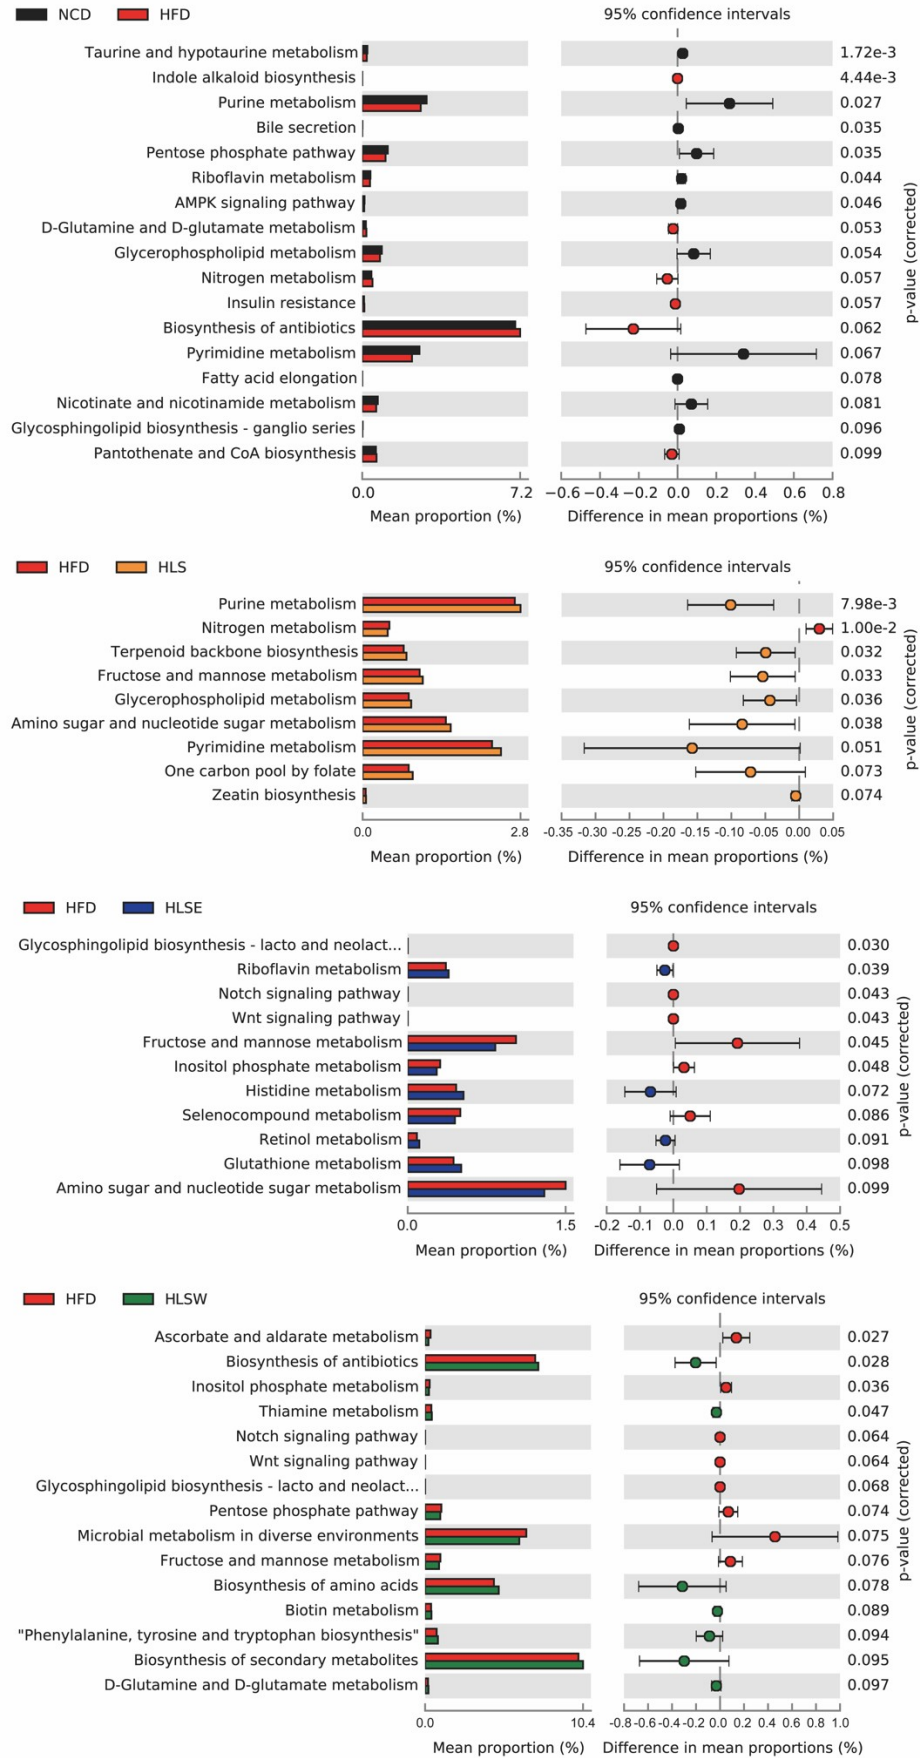

Fig. S3 The difference analysis of microbial functional prediction

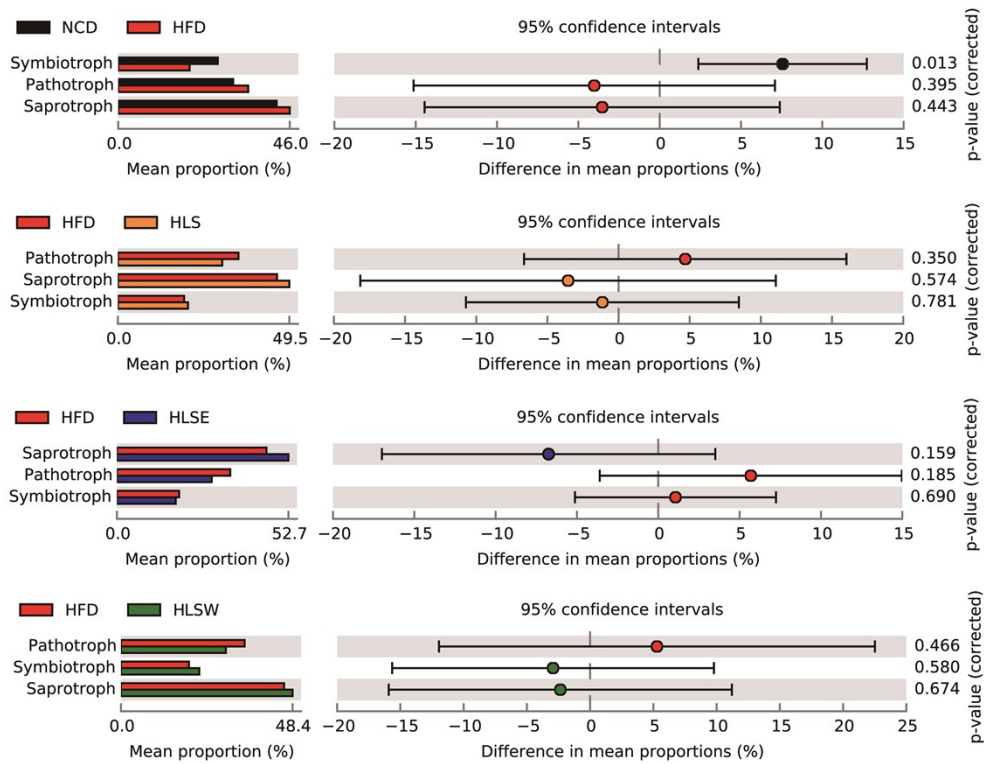

Fig. S4 The difference analysis of mycobial functional prediction

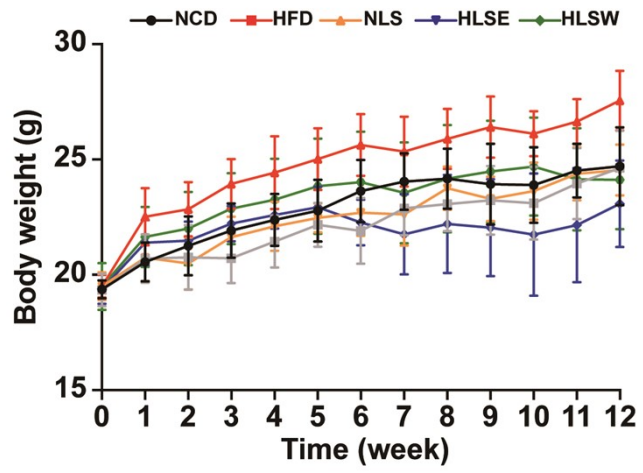

Fig. S5 Effect of *L. chinensis* seed on body weight in mice

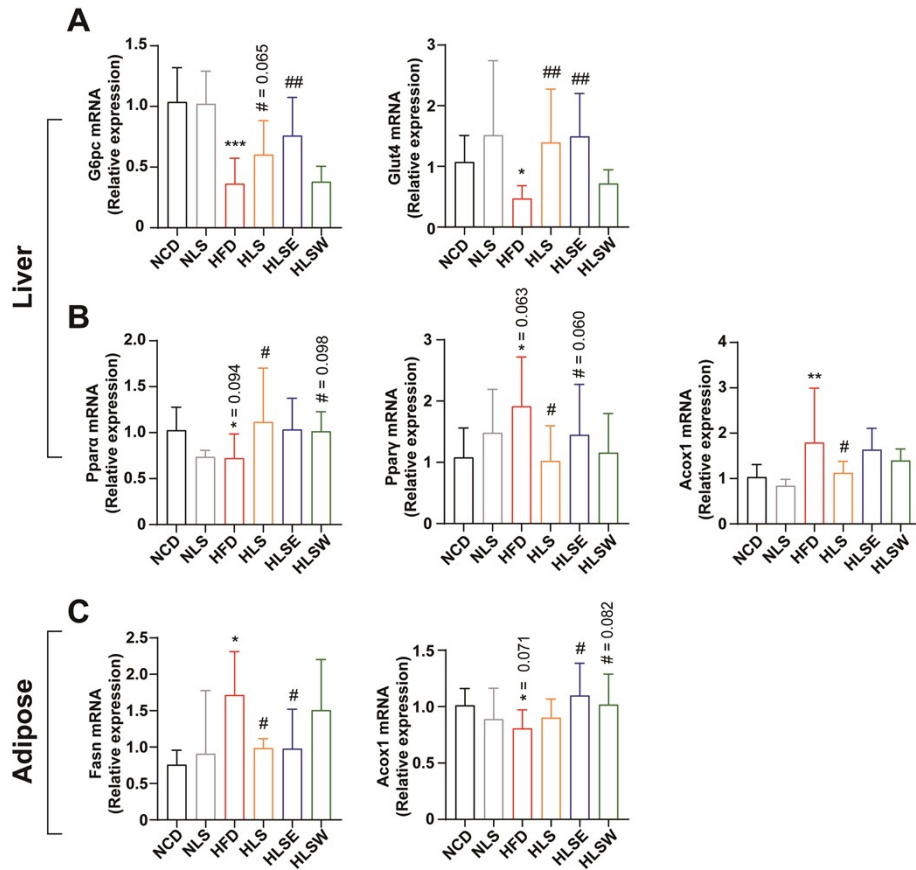

Fig. S6 Effects of *L. chinensis* seed on glucolipid metabolism in mice

(A) The expression of genes related to glucose metabolism in the liver. (B) Expression of genes related to lipid metabolism in the liver and (C) adipose. Results were shown as the mean  $\pm$  SD. \*  $p < 0.05$ , \*\*\*  $p < 0.001$  compared with NCD group, and #  $p < 0.05$ , ##  $p < 0.01$  compared with HFD group by ANOVA one-way statistical analysis.

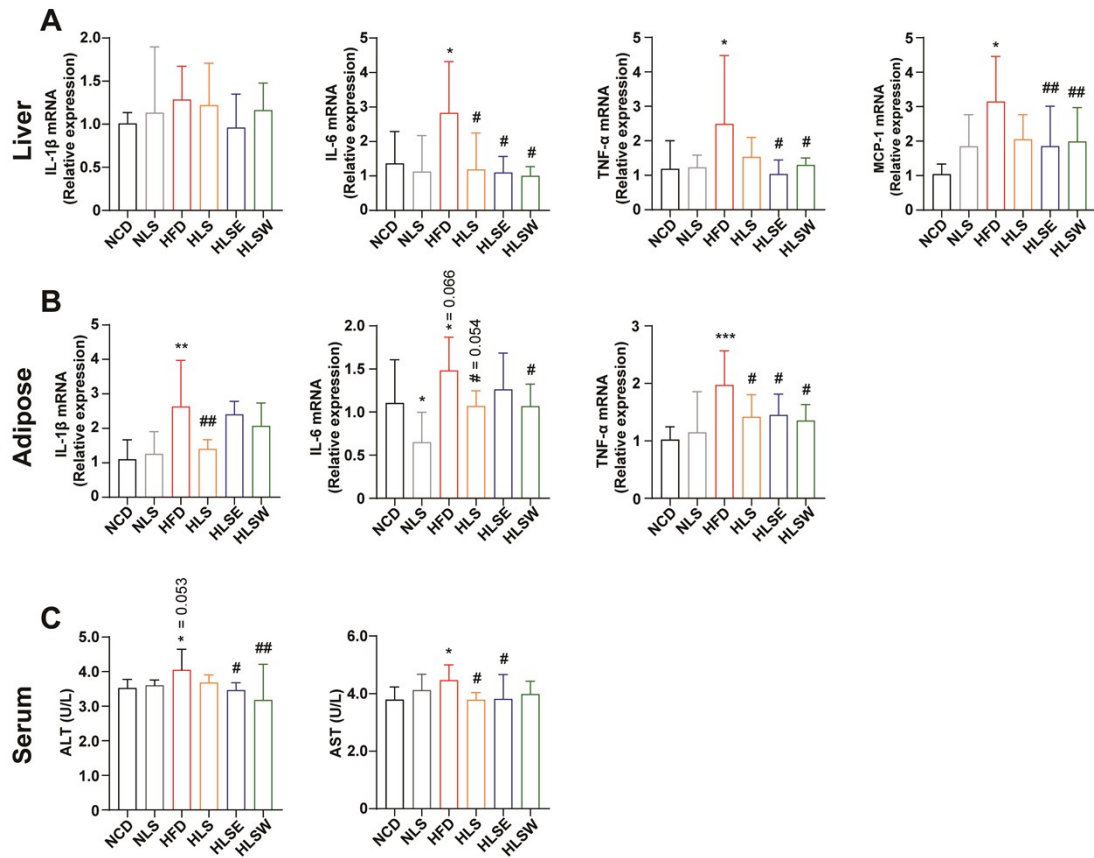

Fig. S7 Effects of *L. chinensis* seed on inflammation and liver function in mice

(A) The expression of inflammatory cytokines in the liver and (B) adipose. (C) Serum ALT and AST levels. Results were shown as the mean  $\pm$  SD. \*  $p < 0.05$ , \*\*  $p < 0.01$ , \*\*\*  $p < 0.001$  compared with NCD group, and #  $p < 0.05$ , ##  $p < 0.01$  compared with HFD group by ANOVA one-way statistical analysis.



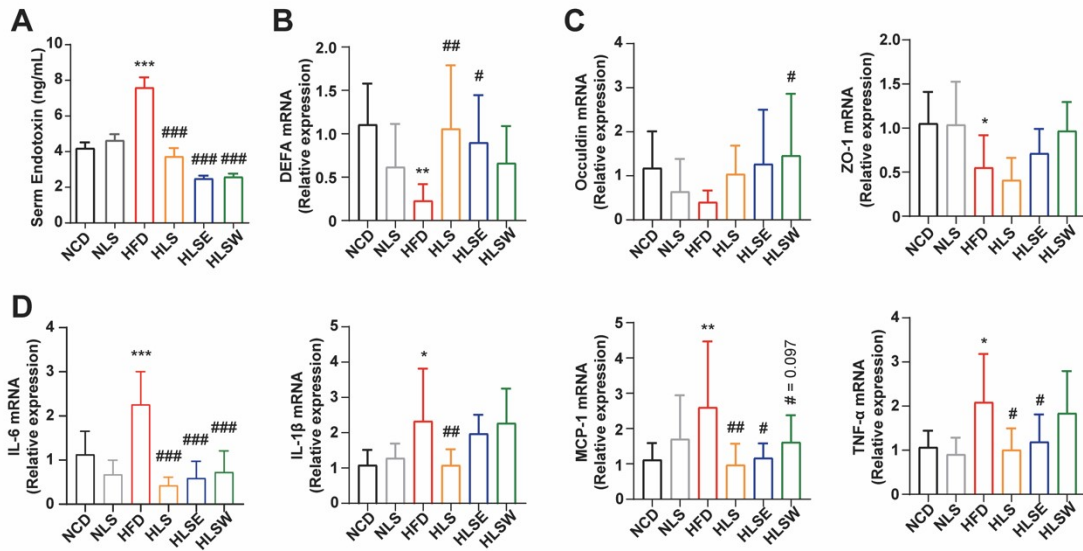

Fig. S8 Effects of *L. chinensis* seed on intestinal functions in mice

(A) Serum endotoxin levels. The expression of (B) *DefA*, (C) *Occludin*, *ZO-1*, and (D) inflammatory cytokines in the intestine. Results were shown as the mean  $\pm$  SD. \*  $p < 0.05$ , \*\*  $p < 0.01$ , \*\*\*  $p < 0.001$  compared with NCD group, and #  $p < 0.05$ , ##  $p < 0.01$ , ###  $p < 0.001$  compared with HFD group by ANOVA one-way statistical analysis.

Table S1. Primer sequences for real-time reverse transcription polymerase chain reaction

| Primer                          | Animal    | Forward sequence (5'-3')   | Reverse sequence (5'-3')   |
|---------------------------------|-----------|----------------------------|----------------------------|
| <i>B2m</i>                      | Mice      | TTGTCTCACTGACCGGCCT        | TATGTTTCGGCTTCCCATTCTCC    |
| <i>Rpl-19</i>                   | Mice      | GAAGGTCAAAGGGAATGTGTTCA    | CCTTGCTGCCTTCAGCTTGT       |
| <i>Gapdh</i>                    | Mice      | GTGTTCTACCCCAATGTGT        | ATTGTCATACCAGGAAATGAGCTT   |
| <i>Glut4</i>                    | Mice      | ACGACGGACACTCCATCTGTTG     | GGAGACATAGCTCATGGCTGGAA    |
| <i>G6pc</i>                     | Mice      | AGGAAGGATGGAGGAAGGAA       | TGGAACCAGATGGGAAAGAG       |
| <i>Fasn</i>                     | Mice      | TTCCAAGACGAAAATGATGC       | AATTGTGGGATCAGGAGAGC       |
| <i>Acox1</i>                    | Mice      | CTATGGGATCAGCCAGAAAGG      | AGTCAAAGGCATCCACCAAAG      |
| <i>Ppara</i>                    | Mice      | CAACGGCGTCGAAGACAAA        | TGACGGTCTCCACGGACAT        |
| <i>Ppar<math>\gamma</math></i>  | Mice      | TCGCTGATGCACTGCCTATG       | GAGAGGTCCACAGAGCTGATT      |
| <i>Tnf-<math>\alpha</math></i>  | Mice      | AGACCCTCACACTCAGATCA       | TCTTTGAGATCCATGCCGTTG      |
| <i>Il-6</i>                     | Mice      | GTTCTCTGGGAAATCGTGGA       | TGTACTIONCAGGTAGCTA        |
| <i>Il-1<math>\beta</math></i>   | Mice      | TCCATGAGCTTTGTACAAGGA      | AGCCCATACTTTAGGAAGACA      |
| <i>Mcp-1</i>                    | Mice      | TTAAAAACCTGGATCGGAACCAA    | GCATTAGCTTCAGATTTACGGGT    |
| <i>ZO-1</i>                     | Mice      | TTTTTGACAGGGGGAGTGG        | TGCTGCAGAGGTCAAAGTTCAAG    |
| <i>Occludin</i>                 | Mice      | ATGTCCGGCCGATGCTCTC        | TTTGCTGCTCTTGGGTCTGTAT     |
| <i>DefA</i>                     | Mice      | GGTGATCATCAGACCCCAGCATCAGT | AAGAGACTAAAACCTGAGGAGCAGC  |
| <i>bax</i>                      | Zebrafish | GATACGGGCAGTGGCAATGA       | ACTCCGGGTCACTTCAGCAT       |
| <i>bcl-2</i>                    | Zebrafish | CGAGTGTGTGGAGAAGGAGATG     | TGGTTGTCTAGGTAGACGGTCAT    |
| <i>il-1<math>\beta</math></i>   | Zebrafish | ATCCAAACGGATACGACCAG       | TCGGTGTCTTTCTGTCCAT        |
| <i>il-6</i>                     | Zebrafish | TCAACTTCTCCAGCGTGATG       | TCTTCCCTCTTTCTCTCTG        |
| <i>tnf-<math>\alpha</math></i>  | Zebrafish | AGGCAATTTCACTTCCAAGG       | AGGTCTTTGATTTCAGAGTTGTATCC |
| <i>ifn-<math>\gamma</math></i>  | Zebrafish | GAGAGGCTGGCACATGTTCAA      | CTCTGCACTCTTGCTGGAAA       |
| <i>ampka</i>                    | Zebrafish | AGTTATCAGCACACCGACAG       | AGTAATCCACCCCTGAGATG       |
| <i>leptin A</i>                 | Zebrafish | CATCATCGTCAGAATCAGGG       | ATCTCGGCGTATCTGGTCAA       |
| <i>ppara</i>                    | Zebrafish | ACGGGAAAGACAAGCACGC        | GTTTCAGCAGACCTCCGCAAGA     |
| <i>nr3c1</i>                    | Zebrafish | TCTCCTCCCAACAGCAGGAC       | GTTGCATACAGTCGCAGCC        |
| <i>orexin</i>                   | Zebrafish | GCTCCTTGCAAACACTACGAG      | GCTCCTTGCAAACACTACGAG      |
| <i>ghrelin</i>                  | Zebrafish | CAAGAGTGGGCAGAAGAGAA       | ATGTAGTTGTAGTGGATGGT       |
| <i><math>\beta</math>-actin</i> | Zebrafish | ACTGTATTGTCTGGTGGTAC       | TACTCCTGCTTGCTAATCC        |
| <i>fabp11a</i>                  | Zebrafish | AGTAGAGGAGCATCATTATTCGGG   | CAAAACCCACACCTATAGCCTTC    |

Table S2. Content of effective components in *L. chinensis* seed extracts using chemical methods

| Samples                                  | Components (%) |              |              |
|------------------------------------------|----------------|--------------|--------------|
|                                          | Polysaccharide | Triterpenoid | Polyphenol   |
| <i>L. chinensis</i> seed water extract   | 73.43 ± 1.77   | 10.65 ± 0.13 | 12.05 ± 2.15 |
| <i>L. chinensis</i> seed ethanol extract | 57.90 ± 1.99   | 20.24 ± 0.22 | 21.65 ± 2.89 |

Data were shown as the mean ± SD.

Table S3. Effects of *L. chinensis* seed on the weight of adipose tissues and liver in mice

| Groups | Adipose tissues and liver weight (mg/g) |                 |                 |                 |                |
|--------|-----------------------------------------|-----------------|-----------------|-----------------|----------------|
|        | Inguinal fat                            | Epididymal fat  | Mesenteric fat  | Perinephric fat | Liver          |
| NCD    | 4.61 ± 0.95                             | 12.16 ± 2.27    | 9.69 ± 2.25     | 2.59 ± 0.58     | 44.21 ± 2.74   |
| NLS    | 3.24 ± 0.43                             | 11.52 ± 2.28    | 8.50 ± 3.82     | 2.28 ± 0.63     | 46.77 ± 6.05   |
| HFD    | 8.36 ± 3.07***                          | 18.27 ± 3.20*** | 16.00 ± 2.49*** | 4.36 ± 1.29***  | 48.87 ± 4.64*  |
| HLS    | 6.90 ± 1.66                             | 8.09 ± 2.04###  | 15.24 ± 2.25    | 3.39 ± 1.02#    | 45.26 ± 2.43   |
| HLSE   | 7.28 ± 1.74                             | 9.12 ± 2.36###  | 14.07 ± 1.90    | 3.06 ± 1.05##   | 42.32 ± 6.29## |
| HLSW   | 6.24 ± 1.59#                            | 12.55 ± 2.01### | 14.32 ± 3.50    | 4.19 ± 1.24     | 42.38 ± 5.84## |

Data were shown as the mean ± SD.

Table S4. Effects of *L. chinensis* seed on serum lipids in mice

| Groups | Serum lipids (mmol/L)      |                           |                          |                            |
|--------|----------------------------|---------------------------|--------------------------|----------------------------|
|        | T-CHO                      | TG                        | HDL-C                    | LDL-C                      |
| NCD    | 2.50 ± 0.28                | 0.86 ± 0.19               | 0.90 ± 0.47              | 0.74 ± 0.09                |
| NLS    | 2.56 ± 0.54                | 0.73 ± 0.28               | 1.03 ± 0.37              | 0.63 ± 0.14                |
| HFD    | 3.49 ± 0.36 <sup>***</sup> | 1.08 ± 0.35               | 0.73 ± 0.15              | 1.08 ± 0.23 <sup>***</sup> |
| HLS    | 2.89 ± 0.30 <sup>#</sup>   | 0.80 ± 0.31               | 0.77 ± 0.09              | 0.74 ± 0.06 <sup>##</sup>  |
| HLSE   | 3.02 ± 0.22                | 0.61 ± 0.21 <sup>##</sup> | 1.09 ± 0.17 <sup>#</sup> | 0.63 ± 0.14 <sup>###</sup> |
| HLSW   | 2.98 ± 1.05                | 0.65 ± 0.23 <sup>##</sup> | 0.87 ± 0.21              | 0.85 ± 0.30 <sup>*</sup>   |

Data were shown as the mean ± SD.
