# Supplementary material for: Litchi chinensis seed prevents obesity and modulates the gut microbiota and mycobiota compositions in high-fat diet-induced obese zebrafish
Source: Royal Society of Chemistry journal article supplement (doi:10.1039/d1fo03991a), 2022-01-01
Supplement: d1fo03991a3.xlsx [file d1fo03991a3.xlsx]

## Sheet: NEG
Main component in Litchi chinensis seed extracts according to the relative peak area by UHPLC-QE-M in negtive-ion mode
NameEN	CompositeScore	InChIKey	SMILES	Formula	name	Class	mzmed	rtmed	LSE	LSW
Citric acid	0.969966076923077	KRKNYBCHXYNGOX-UHFFFAOYSA-N	C(C(=O)O)C(CC(=O)O)(C(=O)O)O	C6H8O7	M191.019T43.556	Carboxylic acids and derivatives	191.019	43.5562	0.012317	0.0340555
D-Gluconic acid	0.971402076923077	RGHNJXZEOKUKBD-UHFFFAOYSA-N	OCC(O)C(O)C(O)C(O)C(O)=O	C6H12O7	M195.050T38.715	Organic acids and derivatives	195.05	38.7154	0.00175528	0.0144976
Quinic acid	0.997962307692308	AAWZDTNXLSGCEK-LNVDRNJUSA-N	O=C(O)C1(O)CC(O)C(O)C(O)C1	C7H12O6	M191.055T38.240	Organooxygen compounds	191.055	38.2403	0.00465046	0.00804635
D-(+)-Malic acid	0.837866923076923	BJEPYKJPYRNKOW-UWTATZPHSA-N	C(C(C(=O)O)O)C(=O)O	C4H6O5	M133.013T41.267	Hydroxy acids and derivatives	133.013	41.2673	0.00230466	0.00764427
(-)-Epicatechin	0.993824384615385	PFTAWBLQPZVEMU-UKRRQHHQSA-N	Oc(c3)c(O)cc(c3)C([H])(O1)C([H])(O)Cc(c(O)2)c(cc(O)c2)1	C15H14O6	M289.072T270.125	Flavonoids	289.072	270.125	0.00388011	0.005556
Protocatechualdehyde	0.997795384615384	IBGBGRVKPALMCQ-UHFFFAOYSA-N	C1=CC(=C(C=C1C=O)O)O	C7H6O3	M137.023T183.279	Phenols	137.023	183.279	0.00522655	0.00397749
Gallic acid	0.984046384615384	LNTHITQWFMADLM-UHFFFAOYSA-N	O=C(O)C1=CC(O)=C(O)C(O)=C1	C7H6O5	M169.013T67.186	Phenols	169.013	67.1861	0.000686272	0.00760157
FA 18:1+3O	0.887581076923077	MDIUMSLCYIJBQC-UHFFFAOYSA-N	O=C(O)CCCCCCCC(O)C=CC(O)C(O)CCCCC	C18H34O5	M329.233T570.163	Miscellaneous	329.233	570.163	0.00529045	0.00279043
(-)-12-hydroxyjasmonic acid	0.691701846153846	RZGFUGXQKMEMOO-BSANDHCLSA-N	O=C(O)CC1CCC(=O)C1CC=CCCO	C12H18O4	M225.113T316.740	Jasmonic acid	225.113	316.74	0.00289925	0.00323728
(2S,3R,4R,5R,6S)-2-[(2R,3R,4S,5R,6R)-2-[2-(3,4-dihydroxyphenyl)ethoxy]-3,5-dihydroxy-6-(hydroxymethyl)oxan-4-yl]oxy-6-methyloxane-3,4,5-triol	0.727529307692308	DORPKYRPJIIARM-GYAWPQPFSA-N	OC1=CC=C(C=C1O)CCOC2OC(CO)C(O)C(OC3OC(C)C(O)C(O)C3O)C2O	C20H30O12	M461.166T325.058	Miscellaneous	461.166	325.058	4.84936e-05	0.00516577
Shikimic Acid	0.996602153846154	JXOHGGNKMLTUBP-HSUXUTPPSA-N	O=C(O)C1=CC(O)C(O)C(O)C1	C7H10O5	M173.045T48.922	Organic acids and derivatives	173.045	48.9221	0.0033944	0.00176792
Benzyl alcohol + Hex-Pen	0.804408923076923	NJMQSVWMCODQIP-UHFFFAOYSA-N	OCC3(O)(COC(OCC2OC(OCC1=CC=CC=C1)C(O)C(O)C2(O))C3(O))	C18H26O10	M447.150T261.295	Miscellaneous	447.15	261.295	0.000374124	0.00406753
Rutin	0.935590692307692	IKGXIBQEEMLURG-NVPNHPEKSA-N	CC1C(C(C(C(O1)OCC2C(C(C(C(O2)OC3=C(OC4=CC(=CC(=C4C3=O)O)O)C5=CC(=C(C=C5)O)O)O)O)O)O)O)O	C27H30O16	M609.147T355.409	Flavonoids	609.147	355.409	0.00101203	0.00216442
Bengenin	0.724393461538461	YWJXCIXBAKGUKZ-HJJNZUOJSA-N	COC1=C(C=C2C(=C1O)C3C(C(C(C(O3)CO)O)O)OC2=O)O	C14H16O9	M327.073T233.621	Phenylpropanoids	327.073	233.621	0.000632302	0.00152712
Salicylic acid	0.979356692307692	YGSDEFSMJLZEOE-UHFFFAOYSA-N	C1=CC=C(C(=C1)C(=O)O)O	C7H6O3	M137.023T414.469	Phenols	137.023	414.469	0.000164882	0.00176289
Methyl hexadecanoate	0.997260692307692	FLIACVVOZYBSBS-UHFFFAOYSA-N	CCCCCCCCCCCCCCCC(=O)OC	C17H34O2	M315.254T749.041	Fatty Acyls	315.254	749.041	0.00171807	2.85221e-06
Pristimerin	0.805348076923077	JFACETXYABVHFD-WXPPGMDDSA-N	O=C1C=C2C(=CC=C3C2(C)CCC4(C)C5CC(C(=O)OC)(C)CCC5(C)CCC34C)C(=C1O)C	C30H40O4	M463.284T1060.970	Terpenoids	463.284	1060.97	0.00157621	1.8299e-07
Phenylalanine	0.969283384615385	COLNVLDHVKWLRT-QMMMGPOBSA-N	O=C(O)C(N)CC=1C=CC=CC1	C9H11NO2	M164.071T94.640	Amino acid derivatives	164.071	94.6399	0.00026021	0.00123501
Trehalose	0.872796769230769	HDTRYLNUVZCQOY-LIZSDCNHSA-N	OCC1OC(OC2OC(CO)C(O)C(O)C2O)C(O)C(O)C1O	C12H22O11	M341.110T49.608	Carbohydrates and derivatives	341.11	49.6078	0.000753658	0.000699557
Epigallocatechin	0.712780230769231	XMOCLSLCDHWDHP-IUODEOHRSA-N	C1C(C(OC2=CC(=CC(=C21)O)O)C3=CC(=C(C(=C3)O)O)O)O	C15H14O7	M305.067T216.944	Polyphenols	305.067	216.944	0.000479153	0.000899743
Threonic acid	0.967861153846154	JPIJQSOTBSSVTP-GBXIJSLDSA-N	O=C(O)C(O)C(O)CO	C4H8O5	M135.029T38.018	Organic acids and derivatives	135.029	38.0177	0.000371434	0.000992377
3-Hydroxybenzaldehyde	1	IAVREABSGIHHMO-UHFFFAOYSA-N	O=CC=1C=CC=C(O)C1	C7H6O2	M121.028T249.459	Phenols	121.028	249.459	0.000690629	0.000573984
Citraconic acid	0.855651769230769	HNEGQIOMVPPMNR-IHWYPQMZSA-N	O=C(O)C=C(C(=O)O)C	C5H6O4	M129.018T52.001	Fatty Acyls	129.018	52.0007	0.000291934	0.000939861
LPC 16:0	0.761670307692308	ASWBNKHCZGQVJV-UHFFFAOYSA-N	O=C(OCC(O)COP(=O)([O-])OCC[N+](C)(C)C)CCCCCCCCCCCCCCC	C24H50NO7P	M540.332T793.102	Lipids	540.332	793.102	0.00094825	0
Azelaic acid	0.752481769230769	BDJRBEYXGGNYIS-UHFFFAOYSA-N	O=C(O)CCCCCCCC(=O)O	C9H16O4	M187.097T415.002	Fatty Acyls	187.097	415.002	0.000219904	0.000664655
12,13-EODE	0.804655230769231	CCPPLLJZDQAOHD-DHZHZOJOSA-N	CCCCCC(O1)C(CC=CCCCCCCCC(O)=O)1	C18H32O3	M295.228T787.270	Fatty acids	295.228	787.27	0.000829701	1.59976e-07
3-(4-HYDROXYPHENYL)LACTATE	0.980979692307692	JVGVDSSUAVXRDY-UHFFFAOYSA-N	C1=CC(=CC=C1CC(C(=O)O)O)O	C9H10O4	M181.050T166.117	Organic acids and derivatives	181.05	166.117	0.000357638	0.000450572
4-HYDROXYBENZOATE	0.946018923076923	FJKROLUGYXJWQN-UHFFFAOYSA-N	C1=CC(=CC=C1C(=O)O)O	C7H6O3	M137.023T45.781	Benzoic acids and derivatives	137.023	45.7814	0.000323514	0.000481317
Uridine	0.607369769230769	DRTQHJPVMGBUCF-XVFCMESISA-N	C1=CN(C(=O)NC1=O)C2C(C(C(O2)CO)O)O	C9H12N2O6	M243.062T48.223	Alkaloids	243.062	48.2231	0.00023277	0.000561219
13-HOTrE	0.783203538461538	KLLGGGQNRTVBSU-JDTPQGGVSA-N	CC\C=C/CC(O)\C=C\C=C/CCCCCCCC(O)=O	C18H30O3	M293.212T750.967	Organic acids and derivatives	293.212	750.967	0.000734822	3.19124e-07
Naringenin chalcone	0.955610461538462	YQHMWTPYORBCMF-ZZXKWVIFSA-N	C1=CC(=CC=C1C=CC(=O)C2=C(C=C(C=C2O)O)O)O	C15H12O5	M271.061T524.197	Flavonoids	271.061	524.197	0.000568037	0.000163155
Glutamylphenylalanine	0.913048384615385	XHHOHZPNYFQJKL-UHFFFAOYSA-N	O=C(O)C(N)CCC(=O)NC(C(=O)O)CC1=CC=CC=C1	C14H18N2O5	M293.124T242.536	Carboxylic acids and derivatives	293.124	242.536	0.000242825	0.000469081
Quercetin	0.965928615384615	REFJWTPEDVJJIY-UHFFFAOYSA-N	C1=CC(=C(C=C1C2=C(C(=O)C3=C(C=C(C=C3O2)O)O)O)O)O	C15H10O7	M301.035T472.993	Flavonoids	301.035	472.993	0.000509267	0.000187627
Ethyl 3,4-dihydroxybenzoate	0.997758692307692	KBPUBCVJHFXPOC-UHFFFAOYSA-N	CCOC(=O)C1=CC(=C(C=C1)O)O	C9H10O4	M181.050T424.179	Phenolic acids	181.05	424.179	0.000656822	2.54969e-05
Procyanidin B2	0.674638230769231	XFZJEEAOWLFHDH-NFJBMHMQSA-N	C1C(C(OC2=C1C(=CC(=C2C3C(C(OC4=CC(=CC(=C34)O)O)C5=CC(=C(C=C5)O)O)O)O)O)C6=CC(=C(C=C6)O)O)O	C30H26O12	M577.135T219.148	Procyanidins	577.135	219.148	0.000212603	0.000422453
P-Anisic acid	0.937520307692308	ZEYHEAKUIGZSGI-UHFFFAOYSA-N	O=C(O)C1=CC=C(OC)C=C1	C8H8O3	M151.039T158.202	Phenols	151.039	158.202	0.000337472	0.00029568
3-phenyllactic acid	0.985068538461538	VOXXWSYKYCBWHO-UHFFFAOYSA-N	O=C(O)C(O)CC=1C=CC=CC1	C9H10O3	M165.055T332.776	Carbonyl	165.055	332.776	0.000192648	0.000406219
trans-4-Coumaric acid	0.883737384615384	NGSWKAQJJWESNS-UHFFFAOYSA-N	OC(=O)C=CC1=CC=C(O)C=C1	C9H8O3	M163.039T271.154	Phenylpropanoids	163.039	271.154	0.000255811	0.00034121
(2S,3S)-3,5,7-trihydroxy-6-methyl-2-(3,4,5-trihydroxyphenyl)-2,3-dihydrochromen-4-one	0.717017307692308	NZRLODDQFPZTPM-CVEARBPZSA-N	O=C1C2=C(O)C(=C(O)C=C2OC(C3=CC(O)=C(O)C(O)=C3)C1O)C	C16H14O8	M333.061T319.248	Flavonoids	333.061	319.248	0.000377084	0.000206607
Phenyl-beta-glucopyranoside	0.614610769230769	NEZJDVYDSZTRFS-RMPHRYRLSA-N	OCC1OC(OC=2C=CC=CC2)C(O)C(O)C1O	C12H16O6	M255.088T197.936	Organic oxygen compounds	255.088	197.936	0.000189745	0.000393183
Scopolin	0.754582615384615	SGTCGCCQZOUMJJ-YMILTQATSA-N	COC1=C(C=C2C(=C1)C=CC(=O)O2)OC3C(C(C(C(O3)CO)O)O)O	C16H18O9	M399.093T222.649	Coumarins and derivatives	399.093	222.649	0.000107659	0.000454911
2-METHYLMALEATE	0.913998384615385	HNEGQIOMVPPMNR-UHFFFAOYSA-N	CC(=CC(=O)O)C(=O)O	C5H6O4	M129.018T73.319	Fatty Acyls	129.018	73.319	0.000222409	0.000334923
Quercetin-3-O-galactoside	0.933306538461538	OVSQVDMCBVZWGM-UHFFFAOYSA-N	O=C2C(OC1OC(CO)C(O)C(O)C1(O))=C(OC3=CC(O)=CC(O)=C23)C4=CC=C(O)C(O)=C4	C21H20O12	M463.088T365.607	Flavonoids	463.088	365.607	0.00015541	0.000387169
p-Hydroxy-cinnamic acid	0.904806692307692	NGSWKAQJJWESNS-ZZXKWVIFSA-N	C1=CC(=CC=C1C=CC(=O)O)O	C9H8O3	M163.039T333.283	Phenylpropanoids	163.039	333.283	0.000203654	0.000326952
Ursonic acid	0.999600846153846	MUCRYNWJQNHDJH-OADIDDRXSA-N	CC1CCC2(CCC3(C(=CCC4C3(CCC5C4(CCC(=O)C5(C)C)C)C)C2C1C)C)C(=O)O	C30H46O3	M453.339T1051.320	Terpenoids	453.339	1051.32	0.000509642	0
Procyanidin A2	0.763722923076923	NSEWTSAADLNHNH-LSBOWGMISA-N	C1C(C(OC2=C1C(=CC3=C2C4C(C(O3)(OC5=CC(=CC(=C45)O)O)C6=CC(=C(C=C6)O)O)O)O)C7=CC(=C(C=C7)O)O)O	C30H24O12	M575.119T327.815	Procyanidins	575.119	327.815	0.00020287	0.000302769
Benzyl alcohol + Hex-Hex	0.713632076923077	WKXRKKUZTXIFJY-UHFFFAOYSA-N	OCC3OC(OCC1=CC=CC=C1)C(OC2OC(CO)C(O)C(O)C2(O))C(O)C3(O)	C19H28O11	M477.162T243.408	Organooxygen compounds	477.162	243.408	1.27932e-06	0.000502023
Psicose	0.956000615384615	BJHIKXHVCXFQLS-PUFIMZNGSA-N	O=C(CO)C(O)C(O)C(O)CO	C6H12O6	M179.055T194.320	Benzene and substituted derivatives	179.055	194.32	0.000103313	0.000398288
Aspartate	0.878380769230769	CKLJMWTZIZZHCS-UHFFFAOYSA-N	C(C(C(=O)O)N)C(=O)O	C4H7NO4	M132.029T274.785	Amino acid derivatives	132.029	274.785	1.54071e-05	0.000454045
Lauryl sulfate	0.988114	MOTZDAYCYVMXPC-UHFFFAOYSA-N	CCCCCCCCCCCCOS(=O)(=O)O	C12H26O4S	M265.148T760.429	Miscellaneous	265.148	760.429	0.000440565	6.57985e-06

## Sheet: POS
Main component in Litchi chinensis seed extracts according to the relative peak area by UHPLC-QE-MS in positive-ion mode
NameEN	CompositeScore	InChIKey	SMILES	Formula	name	Class	mzmed	rtmed	LEE	LEW
L-Isoleucine	0.974932846153846	AGPKZVBTJJNPAG-WHFBIAKZSA-N	O=C(O)C(N)C(C)CC	C6H13NO2	M132.102T61.593	Amino acid derivatives	132.102	61.5932	0.00309444	0.00703208
Adenosine	0.905889769230769	OIRDTQYFTABQOQ-KQYNXXCUSA-N	C1=NC(=C2C(=N1)N(C=N2)C3C(C(C(O3)CO)O)O)N	C10H13N5O4	M268.104T52.330	Alkaloids	268.104	52.3299	0.00290857	0.00491149
Methyl 3,4,5-trimethoxycinnamate	0.670902538461538	KLXHCGFNNUQTEY-AATRIKPKSA-N	O=C(OC)C=CC1=CC(OC)=C(OC)C(OC)=C1	C13H16O5	M275.088T77.306	Phenylpropanoids	275.088	77.3063	0.00424994	0.00325604
4-Guanidinobutyric acid	0.993891230769231	TUHVEAJXIMEOSA-UHFFFAOYSA-N	O=C(O)CCCNC(=N)N	C5H11N3O2	M146.092T43.919	Organic acids and derivatives	146.092	43.9185	0.00101858	0.00616308
Procyanidin A2	0.639793538461538	NSEWTSAADLNHNH-LSBOWGMISA-N	C1C(C(OC2=C1C(=CC3=C2C4C(C(O3)(OC5=CC(=CC(=C45)O)O)C6=CC(=C(C=C6)O)O)O)O)C7=CC(=C(C=C7)O)O)O	C30H24O12	M577.135T340.788	Procyanidins	577.135	340.788	0.00221871	0.00370104
Adenine	0.999824230769231	GFFGJBXGBJISGV-UHFFFAOYSA-N	C1=NC2=NC=NC(=C2N1)N	C5H5N5	M136.062T46.876	Alkaloids	136.062	46.8763	0.00360463	0.00170419
N-Butylbenzenesulfonamide	0.963705076923077	IPRJXAGUEGOFGG-UHFFFAOYSA-N	CCCCNS(=O)(=O)C1=CC=CC=C1	C10H15NO2S	M214.090T1767.280	Miscellaneous	214.09	1767.28	0.00111275	0.00197827
(1R,3R,4S,5R)-1,3,4-trihydroxy-5-[(E)-3-(4-hydroxyphenyl)prop-2-enoyl]oxycyclohexane-1-carboxylic acid	0.925759692307692	BMRSEYFENKXDIS-QHAYPTCMSA-N	O=C(OC1CC(O)(C(=O)O)CC(O)C1O)C=CC2=CC=C(O)C=C2	C16H18O8	M339.107T200.673	Phenylpropanoids	339.107	200.673	0.00156099	0.001467
LPC 16:0	0.793356153846154	ASWBNKHCZGQVJV-UHFFFAOYSA-N	O=C(OCC(O)COP(=O)([O-])OCC[N+](C)(C)C)CCCCCCCCCCCCCCC	C24H50NO7P	M496.341T781.656	Lipids	496.341	781.656	0.00293701	2.59378e-06
L-Valine	0.873187076923077	KZSNJWFQEVHDMF-BYPYZUCNSA-N	CC(C)C(C(=O)O)N	C5H11NO2	M118.087T43.425	Alkaloids	118.087	43.4249	0.000347984	0.00238208
Nicotinamide	0.999540846153846	DFPAKSUCGFBDDF-UHFFFAOYSA-N	C1=CC(=CN=C1)C(=O)N	C6H6N2O	M123.056T50.365	Alkaloids	123.056	50.3652	0.000692316	0.00134999
L-Tryptophan	0.945346230769231	QIVBCDIJIAJPQS-VIFPVBQESA-N	C1=CC=C2C(=C1)C(=CN2)CC(C(=O)O)N	C11H12N2O2	M205.097T168.657	Organoheterocyclic compounds	205.097	168.657	0.000287441	0.00166626
Guanine	1	UYTPUPDQBNUYGX-UHFFFAOYSA-N	C1=NC2=C(N1)C(=O)NC(=N2)N	C5H5N5O	M152.057T55.296	Organoheterocyclic compounds	152.057	55.2962	0.000884413	0.00090812
kojic acid	0.995591076923077	BEJNERDRQOWKJM-UHFFFAOYSA-N	O=C1C=C(OC=C1O)CO	C6H6O4	M143.034T146.603	Organoheterocyclic compounds	143.034	146.603	0.000354636	0.00135833
2-Phenylethyl beta-D-glucopyranoside	0.861937384615384	MLRIJUWUQTVDQE-RKQHYHRCSA-N	OC[C@H]1O[C@@H](OCCC2=CC=CC=C2)[C@H](O)[C@@H](O)[C@@H]1O	C14H20O6	M302.160T330.991	Organic oxygen compounds	302.16	330.991	5.83372e-05	0.00163951
Schizandrin A	0.947013384615385	JEJFTTRHGBKKEI-UHFFFAOYSA-N	CC1CC2=CC(=C(C(=C2C3=C(C(=C(C=C3CC1C)OC)OC)OC)OC)OC)OC	C24H32O6	M417.228T835.543	Lignans	417.228	835.543	0.0014516	0.000154463
Cytosine	0.999915615384615	OPTASPLRGRRNAP-UHFFFAOYSA-N	C1=C(NC(=O)N=C1)N	C4H5N3O	M112.051T41.944	Alkaloids	112.051	41.9439	0.000253119	0.00129783
Phthalic anhydride	0.934152461538462	LGRFSURHDFAFJT-UHFFFAOYSA-N	O=c(o1)c(c2)c(ccc2)c(=O)1	C8H4O3	M149.024T863.354	Miscellaneous	149.024	863.354	0.00130095	3.59201e-05
Trigonelline HCl	0.996255	TZSYLWAXZMNUJB-UHFFFAOYSA-N	C[N+]1=CC=CC(=C1)C(=O)O.[Cl-]	C7H7NO2.HCl	M138.055T41.649	Alkaloids	138.055	41.6493	0.000560671	0.000718854
Isofraxidin	0.992021769230769	HOEVRHHMDJKUMZ-UHFFFAOYSA-N	COC1=CC2=C(OC(=O)C=C2)C(OC)=C1O	C11H10O5	M223.060T361.821	Phenylpropanoids	223.06	361.821	0.000421586	0.000836968
Pyrocatechol	0.620556153846154	YCIMNLLNPGFGHC-UHFFFAOYSA-N	OC1=CC=CC=C1O	C6H6O2	M111.045T45.400	Phenols	111.045	45.3995	0.000116632	0.0011127
5-Hydroxymethylfurfural	0.934623307692308	NOEGNKMFWQHSLB-UHFFFAOYSA-N	C1=C(OC(=C1)C=O)CO	C6H6O3	M127.039T1780.375	Organooxygen compounds	127.039	1780.38	0.000193205	0.000822041
Quebrachitol	0.729773384615385	DSCFFEYYQKSRSV-UHFFFAOYSA-N	OC1C(O)C(O)C(OC)C(O)C1O	C7H14O6	M233.042T38.682	Miscellaneous	233.042	38.6825	0.000500109	0.00047668
2-(3,4-dihydroxyphenyl)-5,7-dihydroxy-3-[(2S,3R,4S,5S,6R)-3,4,5-trihydroxy-6-[[(2R,3R,4R,5R,6S)-3,4,5-trihydroxy-6-methyloxan-2-yl]oxymethyl]oxan-2-yl]oxychromen-4-one	0.947213538461538	IKGXIBQEEMLURG-NVPNHPEKSA-N	C[C@@H]1O[C@@H](OC[C@H]2O[C@@H](OC3=C(OC4=CC(O)=CC(O)=C4C3=O)C5=CC=C(O)C(O)=C5)[C@H](O)[C@@H](O)[C@@H]2O)[C@H](O)[C@H](O)[C@H]1O	C27H30O16	M611.162T355.592	Flavonoids	611.162	355.592	0.000233647	0.000717532
Guanosine	0.960352	NYHBQMYGNKIUIF-UUOKFMHZSA-N	C1=NC2=C(N1C3C(C(C(O3)CO)O)O)N=C(NC2=O)N	C10H13N5O5	M284.099T55.296	Alkaloids	284.099	55.2962	0.00046521	0.000453759
Stachydrine	0.887588769230769	CMUNUTVVOOHQPW-LURJTMIESA-N	C[N+]1(CCCC1C(=O)[O-])C	C7H13NO2	M144.102T47.402	Alkaloids	144.102	47.4023	2.42897e-05	0.000852942
Phenethylamine	1	BHHGXPLMPWCGHP-UHFFFAOYSA-N	NCCC=1C=CC=CC1	C8H11N	M122.097T1140.090	Benzenoids	122.097	1140.09	8.48512e-05	0.000791946
loganic acid	0.819382307692308	JNNGEAWILNVFFD-CDJYTOATSA-N	O=C(O)C1=COC(OC2OC(CO)C(O)C(O)C2O)C3C1CC(O)C3C	C16H24O10	M377.145T281.553	Organic acids and derivatives	377.145	281.553	0.000452396	0.00024409
Aspartic acid	0.990480153846154	CKLJMWTZIZZHCS-UHFFFAOYSA-N	C(C(C(=O)O)N)C(=O)O	C4H7NO4	M134.045T275.861	Amino acid derivatives	134.045	275.861	7.54928e-06	0.000668026
sclareol	0.643058923076923	XVULBTBTFGYVRC-UHFFFAOYSA-N	OC(C=C)(C)CCC1C(O)(C)CCC2C(C)(C)CCCC12C	C20H36O2	M326.306T949.370	Terpenoids	326.306	949.37	0.000652297	1.98426e-07
Bergenin	0.982039846153846	YWJXCIXBAKGUKZ-HJJNZUOJSA-N	O=C1OC2C(O)C(O)C(OC2C3=C(O)C(OC)=C(O)C=C13)CO	C14H16O9	M351.069T40.168	Phenols	351.069	40.1684	0.00018435	0.000458312
Protocatechualdehyde	0.901910076923077	IBGBGRVKPALMCQ-UHFFFAOYSA-N	C1=CC(=C(C=C1C=O)O)O	C7H6O3	M139.039T183.025	Phenols	139.039	183.025	0.00026564	0.00037211
6-Shogaol	0.705609769230769	OQWKEEOHDMUXEO-BQYQJAHWSA-N	CCCCCC=CC(=O)CCC1=CC(=C(C=C1)O)OC	C17H24O3	M277.180T803.083	Phenols	277.18	803.083	0.000596368	3.73788e-06
3-Formylindole	0.971013769230769	OLNJUISKUQQNIM-UHFFFAOYSA-N	c1ccc2c(c1)c(c[nH]2)C=O	C9H7NO	M146.060T383.756	Alkaloids	146.06	383.756	0.000155591	0.000444414
Morin	0.991408538461538	YXOLAZRVSSWPPT-UHFFFAOYSA-N	C1=CC(=C(C=C1O)O)C2=C(C(=O)C3=C(C=C(C=C3O2)O)O)O	C15H10O7	M303.050T355.592	Flavonoids	303.05	355.592	0.00013073	0.000461467
Phenylalanine	0.802438	COLNVLDHVKWLRT-QMMMGPOBSA-N	O=C(O)C(N)CC=1C=CC=CC1	C9H11NO2	M166.086T258.837	Amino acid derivatives	166.086	258.837	0.000227486	0.000362637
4-Aminophenol	0.976470384615384	PLIKAWJENQZMHA-UHFFFAOYSA-N	NC1=CC=C(O)C=C1	C6H7NO	M110.061T45.893	Benzene and substituted derivatives	110.061	45.8931	7.65858e-05	0.000505798
Arginine	0.988030846153846	ODKSFYDXXFIFQN-UHFFFAOYSA-N	C(CC(C(=O)O)N)CN=C(N)N	C6H14N4O2	M175.119T39.476	Amino acid derivatives	175.119	39.4757	2.71744e-05	0.000550587
3-Furfuryl 2-pyrrolecarboxylate	0.735897692307692	CSYQMTPUTVJNPT-UHFFFAOYSA-N	C1=CNC(=C1)C(=O)OCC2=COC=C2	C10H9NO3	M192.066T241.239	Alkaloids	192.066	241.239	1.12816e-05	0.000559532
β-Gentiobiose	0.802503615384615	DLRVVLDZNNYCBX-CQUJWQHSSA-N	OCC1OC(OCC2OC(O)C(O)C(O)C2O)C(O)C(O)C1O	C12H22O11	M360.151T43.871	Miscellaneous	360.151	43.8708	0.000245242	0.000301901
Phloretin	0.842943615384615	VGEREEWJJVICBM-UHFFFAOYSA-N	O=C(C=1C(O)=CC(O)=CC1O)CCC2=CC=C(O)C=C2	C15H14O5	M275.092T426.779	Flavonoids	275.092	426.779	0.000129403	0.000414788
alpha-Linolenic acid	0.979773461538461	DTOSIQBPPRVQHS-PDBXOOCHSA-N	CCC=CCC=CCC=CCCCCCCCC(=O)O	C18H30O2	M279.232T788.248	Fatty Acyls	279.232	788.248	0.000530501	6.08633e-06
2-Hydroxyacetophenone	0.964919230769231	ZWVHTXAYIKBMEE-UHFFFAOYSA-N	O=C(C=1C=CC=CC1)CO	C8H8O2	M137.060T233.722	Phenols	137.06	233.722	4.65629e-05	0.000478125
Liquiritigenin	0.768861307692308	FURUXTVZLHCCNA-AWEZNQCLSA-N	C1C(OC2=C(C1=O)C=CC(=C2)O)C3=CC=C(C=C3)O	C15H12O4	M257.081T498.780	Flavonoids	257.081	498.78	0.000387545	0.000118708
Noreugenin	0.985198923076923	NCUJRUDLFCGVOE-UHFFFAOYSA-N	CC1=CC(=O)C2=C(C=C(C=C2O1)O)O	C10H8O4	M193.050T290.702	Flavonoids	193.05	290.702	0.000249573	0.000232496
cytarabine	0.904684076923077	UHDGCWIWMRVCDJ-UHFFFAOYSA-N	C1=CN(C(=O)N=C1N)C2C(C(C(O2)CO)O)O	C9H13N3O5	M244.093T41.896	Cytosine derivatives	244.093	41.8961	8.36898e-05	0.000389467
GLUCOSAMINE	0.804673692307692	MSWZFWKMSRAUBD-IVMDWMLBSA-N	OCC1OC(O)C(N)C(O)C1O	C6H13NO5	M180.087T41.896	Organooxygen compounds	180.087	41.8962	0.000119695	0.000330479
ADENOSINE 3',5'-CYCLIC MONOPHOSPHATE	0.933341692307692	IVOMOUWHDPKRLL-KQYNXXCUSA-N	O=P1(O)OCC2OC(N3C=NC=4C(=NC=NC43)N)C(O)C2O1	C10H12N5O6P	M330.059T43.871	Alkaloids	330.059	43.8708	3.38519e-05	0.00039948
AMINOADIPATE	0.638691076923077	OYIFNHCXNCRBQI-BYPYZUCNSA-N	O=C(O)CCCC(N)C(=O)O	C6H11NO4	M162.076T42.342	Amino acid derivatives	162.076	42.3421	0.000174444	0.000234629
3-Hydroxybenzaldehyde	0.992618692307692	IAVREABSGIHHMO-UHFFFAOYSA-N	O=CC=1C=CC=C(O)C1	C7H6O2	M123.045T252.071	Phenols	123.045	252.071	0.000140199	0.00020847
Tetramethylpyrazine	0.994361230769231	FINHMKGKINIASC-UHFFFAOYSA-N	CC1=C(N=C(C(=N1)C)C)C	C8H12N2	M137.108T187.615	Alkaloids	137.108	187.615	0.000279037	3.80163e-05
Coniferyl aldehyde	0.805631692307692	DKZBBWMURDFHNE-UHFFFAOYSA-N	COC1=CC(C=CC=O)=CC=C1O	C10H10O3	M179.071T394.574	Phenylpropanoids	179.071	394.574	8.47847e-05	0.000228864
Ginkgolide B	0.828142307692308	SQOJOAFXDQDRGF-MMQTXUMRSA-N	C[C@@H]1C(=O)O[C@H]2[C@H](O)[C@@]34[C@H]5C[C@@H](C(C)(C)C)[C@@]33[C@@H](O)C(=O)O[C@H]3O[C@@]4(C(=O)O5)[C@@]12O	C20H24O10	M425.142T260.395	Terpenoids	425.142	260.395	2.63513e-05	0.00028708
Procyanidin B1	0.784836615384615	XFZJEEAOWLFHDH-UKWJTHFESA-N	C1C(C(OC2=C1C(=CC(=C2C3C(C(OC4=CC(=CC(=C34)O)O)C5=CC(=C(C=C5)O)O)O)O)O)C6=CC(=C(C=C6)O)O)O	C30H26O12	M579.151T234.750	Procyanidins	579.151	234.75	5.78546e-05	0.000254356
Tyrosine	0.872707769230769	OUYCCCASQSFEME-UHFFFAOYSA-N	O=C(O)C(N)CC1=CC=C(O)C=C1	C9H11NO3	M182.082T41.896	Amino acid derivatives	182.082	41.8963	0.000126576	0.000145777
Asperhenamate_120258	0.660996846153846	CVULDJMCSSACEO-UHFFFAOYSA-N	C1=CC=C(C=C1)CC(COC(=O)C(CC2=CC=CC=C2)NC(=O)C3=CC=CC=C3)NC(=O)C4=CC=CC=C4	C32H30N2O4	M529.205T522.891	Miscellaneous	529.205	522.891	9.12577e-08	0.000263906
Di(2-ethylhexyl)phthalate (DEHP)	0.869341230769231	BJQHLKABXJIVAM-UHFFFAOYSA-N	CCCCC(CC)COC(=O)c1ccccc1C(=O)OCC(CC)CCCC	C24H38O4	M391.285T1124.365	Miscellaneous	391.285	1124.37	0.000244456	1.6499e-05
Scopolin	0.971614384615385	SGTCGCCQZOUMJJ-YMILTQATSA-N	COC1=C(C=C2C(=C1)C=CC(=O)O2)OC3C(C(C(C(O3)CO)O)O)O	C16H18O9	M355.102T223.590	Coumarins and derivatives	355.102	223.59	3.74576e-05	0.000214165
Luteolin	0.993645615384615	IQPNAANSBPBGFQ-UHFFFAOYSA-N	C1=CC(=C(C=C1C2=CC(=O)C3=C(C=C(C=C3O2)O)O)O)O	C15H10O6	M287.055T370.656	Flavonoids	287.055	370.656	7.64901e-05	0.000164403
Coumaric acid	0.959267230769231	NGSWKAQJJWESNS-UHFFFAOYSA-N	O=C(O)C=CC1=CC=C(O)C=C1	C9H8O3	M147.044T254.653	Phenylpropanoids	147.044	254.653	0.000112848	0.000127351
Epicatechin	0.839510538461538	PFTAWBLQPZVEMU-UKRRQHHQSA-N	C1C(C(OC2=CC(=CC(=C21)O)O)C3=CC(=C(C=C3)O)O)O	C15H14O6	M291.087T224.635	Flavonoids	291.087	224.635	5.35562e-05	0.000178378
quercetin-3-O-beta-glucopyranoside	0.963656307692308	OVSQVDMCBVZWGM-QSOFNFLRSA-N	OCC(O1)C(O)C(O)C(O)C1OC(C(=O)3)=C(Oc(c4)c(c(O)cc(O)4)3)c(c2)cc(O)c(O)c2	C21H20O12	M465.104T360.476	Flavonoids	465.104	360.476	4.72904e-05	0.000183902
2'-Deoxyadenosine	0.762652846153846	OLXZPDWKRNYJJZ-UHFFFAOYSA-N	C1C(C(OC1N2C=NC3=C2N=CN=C3N)CO)O	C10H13N5O3	M252.108T42.342	Alkaloids	252.108	42.3421	4.78333e-05	0.000161963
Vanillin	0.983322	MWOOGOJBHIARFG-UHFFFAOYSA-N	COC1=C(C=CC(=C1)C=O)O	C8H8O3	M153.055T302.958	Phenols	153.055	302.958	6.00508e-05	0.000139299
1-[[(2S,3R,11bR)-3-ethyl-9,10-dimethoxy-2,3,4,6,7,11b-hexahydro-1H-benzo[a]quinolizin-2-yl]methyl]-7-methoxy-3,4-dihydro-2H-isoquinolin-6-one	0.610575538461538	CLNILJPYOXIKRO-WPSZSDGUSA-N	O=C1C=C2C(C=C1OC)=C(NCC2)CC3CC4C5=CC(OC)=C(OC)C=C5CCN4CC3CC	C28H36N2O4	M487.254T537.562	Alkaloids	487.254	537.562	0.000134581	6.43932e-05
2-[[(2R,3S)-2-(3,4-dihydroxyphenyl)-3,5-dihydroxy-3,4-dihydro-2H-chromen-7-yl]oxy]oxane-3,4,5-triol	0.745893846153846	UQKKDJWFQBNZBJ-PTVYBAHFSA-N	OC1=CC=C(C=C1O)C2OC3=CC(OC4OCC(O)C(O)C4O)=CC(O)=C3CC2O	C20H22O10	M423.127T85.125	Miscellaneous	423.127	85.125	1.80526e-05	0.000176007
Isorhamnetin-3-O-nehesperidine	0.951865153846154	QHLKSZBFIJJREC-SPSUIZEHSA-N	CC1C(C(C(C(O1)OC2C(C(C(OC2OC3=C(OC4=CC(=CC(=C4C3=O)O)O)C5=CC(=C(C=C5)O)OC)CO)O)O)O)O)O	C28H32O16	M625.178T389.321	Flavonoids	625.178	389.321	6.68119e-05	0.000124273
rosmarinic acid	0.804228076923077	DOUMFZQKYFQNTF-WUTVXBCWSA-N	O=C(OC(C(=O)O)CC1=CC=C(O)C(O)=C1)C=CC2=CC=C(O)C(O)=C2	C18H16O8	M361.089T272.776	Phenylpropanoids	361.089	272.776	0.00012706	6.30964e-05
Naringenin	0.996388769230769	FTVWIRXFELQLPI-ZDUSSCGKSA-N	OC1=CC=C(C=C1)[C@@H]1CC(=O)C2=C(O)C=C(O)C=C2O1	C15H12O5	M273.076T524.446	Flavonoids	273.076	524.446	0.000148977	4.00535e-05
monolinolein	0.812316769230769	WECGLUPZRHILCT-HZJYTTRNSA-N	O=C(OCC(O)CO)CCCCCCCC=CCC=CCCCCC	C21H38O4	M355.285T715.568	Phospholipid	355.285	715.568	0.000187257	1.19996e-07
(2S,3S)-2-(3,4-dihydroxyphenyl)-3,7-dihydroxy-2,3-dihydrochromen-4-one	0.749520230769231	FNUPUYFWZXZMIE-CABCVRRESA-N	O=C1C2=CC=C(O)C=C2OC(C3=CC=C(O)C(O)=C3)C1O	C15H12O6	M289.071T379.541	Flavonoids	289.071	379.541	4.37745e-05	0.00013923
Pyroglutamic acid (not validated, isomer of 88)	0.941781615384615	ODHCTXKNWHHXJC-UHFFFAOYSA-N	O=C(O)C1NC(=O)CC1	C5H7NO3	M130.050T104.219	Amino acid derivatives	130.05	104.219	3.08213e-05	0.00014989
Grandisin	0.708234384615385	ZPINJJOPURFFNV-UHFFFAOYSA-N	COC1=CC(=CC(OC)=C1OC)C2OC(C(C)C2C)C3=CC(OC)=C(OC)C(OC)=C3	C24H32O7	M415.212T772.402	Phenylpropanoids	415.212	772.402	7.05651e-05	0.00010061
Fraxetin	0.971543538461538	HAVWRBANWNTOJX-UHFFFAOYSA-N	COC1=C(C(=C2C(=C1)C=CC(=O)O2)O)O	C10H8O5	M209.045T290.702	Coumarins and derivatives	209.045	290.702	6.21081e-05	9.87892e-05
Vanillic acid	0.720319384615384	WKOLLVMJNQIZCI-UHFFFAOYSA-N	COC1=C(C=CC(=C1)C(=O)O)O	C8H8O4	M169.050T227.785	Organic acids and derivatives	169.05	227.785	6.11561e-05	9.15503e-05
Cyclopenta[c]pyran-4-carboxylic acid, 7-[(acetyloxy)methyl]-1-(beta-D-glucopyranosyloxy)-1,4a,5,7a-tetrahydro-5-hydroxy-, (1S,4aS,5S,7aS)-	0.713140307692308	DGDWCRWJRNMRKX-DILZHRMZSA-N	CC(=O)OC\C1=C\[C@H](O)[C@H]\2[C@@H]1[C@@H](O\C=C2C(O)=O)O[C@@H]3O[C@H](CO)[C@@H](O)[C@H](O)[C@H]3O	C18H24O12	M455.116T38.682	Iridoids	455.116	38.6825	4.47047e-05	0.000107731
Andrographolide	0.893876846153846	BOJKULTULYSRAS-JBOCACNOSA-N	C=C1CCC2C(C)(CO)C(O)CC[C@]2(C)C1C/C=C1/C(=O)OCC1O	C20H30O5	M351.215T604.041	Terpenoids	351.215	604.041	8.58478e-05	6.59555e-05
Wilforlide A	0.968751846153846	HHQJBWYXBWOFJY-YLXTXNMFSA-N	CC1(C2CCC3(C(C2(CCC1O)C)CC=C4C3(CCC5(C4CC6(CC5OC6=O)C)C)C)C)C	C30H46O3	M455.353T647.658	Terpenoids	455.353	647.658	0.000149951	1.82221e-08
2,6-Dimethoxyquinone	0.655430923076923	OLBNOBQOQZRLMP-UHFFFAOYSA-N	O=C1C=C(OC)C(=O)C(OC)=C1	C8H8O4	M186.076T71.483	Quinones	186.076	71.483	4.17807e-05	0.000106582
HUMULENE (alpha)	0.815868692307692	FAMPSKZZVDUYOS-UCSRMCRJSA-N	C1=CC(C)(C)CC=C(C)CCC=C(C)C1	C15H24	M205.196T838.068	Sesquiterpenoids	205.196	838.068	0.000146087	5.45833e-07
